# Supplementary material
Source: publisher site journal article supplement (https://www.dovepress.com/article/367985)
Supplement: Supplementary file 1 [file get_supplementary_file.php]

**Supplemental Table 1** Conditional logit estimates-Respondents who passed the consistency test (N = 829)

| **Attributes** | **β** | **SE** |
| --- | --- | --- |
| **Out-of-pocket medication cost per month** | -0.002 | 0.002 |
| **Mode of administration**  (ref. Insulin once daily) |  |  |
| Insulin once daily | 0.526*** | 0.148 |
| Oral medication 3 times daily | 1.464*** | 0.198 |
| Oral medication twice daily | 1.282*** | 0.131 |
| **Fasting blood glucose control effect**  (ref. 9 years) |  |  |
| About 8mol/L | 0.277*** | 0.103 |
| About 7mol/L | 0.324* | 0.178 |
| About 6mol/L | 0.801*** | 0.076 |
| **Frequency of hypoglycemia events**  (ref. About once a week) |  |  |
| About once a month | 0.970*** | 0.158 |
| About once a year | 1.486*** | 0.108 |
| None | 2.182*** | 0.221 |
| **AIC** | 4859.872 | |
| **BIC** | 4930.079 | |
| **Log likelihood** | -2419.9362 | |
| **Respondents, n** | 829 | |
| **Observations, n** | 8272 | |

**Notes:** –, none or not applicable. *P<0.05. ***p < 0.001.

**Abbreviations:** β, coefficient. SE, standard error. ref, reference level. AIC, Akaike information criterion. BIC, Bayesian information criterion.

**Supplemental Table 2** Conditional logit estimates-Full sample (N = 885)

| **Attributes** | **β** | **SE** |
| --- | --- | --- |
| **Out-of-pocket medication cost per month** | -0.003 | 0.002 |
| **Mode of administration**  (ref. Insulin once daily) |  |  |
| Insulin once daily | 0.464*** | 0.142 |
| Oral medication 3 times daily | 1.404*** | 0.192 |
| Oral medication twice daily | 1.230*** | 0.127 |
| **Fasting blood glucose control effect**  (ref. 9 years) |  |  |
| About 8mol/L | 0.287*** | 0.099 |
| About 7mol/L | 0.309* | 0.172 |
| About 6mol/L | 0.790*** | 0.075 |
| **Frequency of hypoglycemia events**  (ref. About once a week) |  |  |
| About once a month | 0.917*** | 0.151 |
| About once a year | 1.425*** | 0.103 |
| None | 2.096*** | 0.213 |
| **AIC** | 5231.678 | |
| **BIC** | 5302.526 | |
| **Log likelihood** | -2605.8392 | |
| **Respondents, n** | 885 | |
| **Observations, n** | 8820 | |

**Notes:** –, none or not applicable. *P<0.05. ***p < 0.001.

**Abbreviations:** β, coefficient. SE, standard error. ref, reference level. AIC, Akaike information criterion. BIC, Bayesian information criterion.

**Supplemental Table 3** Subgroup analysis: relative importance of medication attributes

| Analyzed group | 1st-most important characteristic, and relative importance (%) | | 2nd-most important characteristic, and relative importance (%) | | 3rd-most important characteristic, and relative importance (%) | | 4th-most important characteristic, and relative importance (%) | |
| --- | --- | --- | --- | --- | --- | --- | --- | --- |
| **Overall population**  **(n=829)** | Event | 39.19 | Admin | 30.32 | Effect | 16.19 | Cost | 13.54 |
| **Male**  **(n=277)** | Admin | 49.31 | Event | 24.37 | Effect | 15.77 | Cost | 10.55 |
| **Female**  **(n=551)** | Event | 40.84 | Admin | 20.88 | Cost | 20.82 | Effect | 17.46 |
| **Younger age [≤60 years]**  **(n=259)** | Admin | 52.81 | Event | 32.62 | Effect | 13.62 | Cost | 1.09 |
| **Older age [＞60 years]**  **(n=568)** | Event | 40.48 | Effect | 21.00 | Admin | 20.85 | Cost | 17.67 |
| **Rural**  **(n=361)** | Admin | 35.53 | Event | 31.45 | Effect | 17.68 | Cost | 15.34 |
| **City**  **(n=468)** | Event | 45.28 | Admin | 25.25 | Effect | 17.23 | Cost | 12.25 |
| **Education Level [Illiteracy] (n=209)** | Event | 35.30 | Admin | 32.75 | Cost | 17.76 | Effect | 14.20 |
| **Education Level [Primary school] (n=274)** | Event | 36.91 | Admin | 27.02 | Cost | 18.33 | Effect | 17.74 |
| **Education Level [Middle school] (n=222)** | Event | 36.85 | Admin | 35.05 | Effect | 18.85 | Cost | 9.25 |
| **Education Level [High school and above](n=123)** | Event | 42.68 | Admin | 34.40 | Effect | 15.52 | Cost | 7.40 |
| **complications [Yes]**  **(n=299)** | Event | 41.09 | Admin | 24.89 | Effect | 19.70 | Cost | 14.32 |
| **Complications [No]**  **(n=522)** | Event | 37.46 | Admin | 34.56 | Effect | 15.86 | Cost | 12.13 |
| **Time since diagnosis**  **[﹤5 years] (n=241)** | Effect | 44.92 | Admin | 25.62 | Cost | 22.98 | Event | 6.49 |
| **Time since diagnosis**  **[5-10 years] (n=395)** | Event | 39.84 | Admin | 25.22 | Event | 18.12 | Cost | 16.83 |
| **Time since diagnosis**  **[＞10 years] (n=193)** | Event | 39.51 | Admin | 29.17 | Effect | 29.17 | Cost | 9.83 |

**Notes:** Admin , Mode of administration. Cost, Out-of-pocket medication cost per month. Effect, Fasting blood glucose control effect. Event, Frequency of hypoglycemia events.
